# Supplementary material
Source: publisher figshare collection journal article supplement (https://sage.figshare.com/ndownloader/files/23797992)
Supplement: Supplementary file 1 [file 23797992]

## Sheet: Supplemental Table
	Biacore 8K					Carterra LSA
Fab ID	Rank order	ka (1/Ms)	kd (1/s)	KD (nM)	Rmax	Rank Order	Mean ka (1/Ms)	ka Std. Dev.	Mean kd (1/s)	kd Std. Dev.	Mean KD (nM)	KD Std. Dev.	% Variance	KD Low	KD High	KD Across Platforms Agree Within Statistical Limits?	KD (nM) Difference (8K - LSA)
FAb10	1	61300	0.000635	10.3589	100.9	1	96200	8300	0.00079	4.81e-05	8.21206	0.873	10.6307	7.33906	9.08506	N	2.14683
FAb03	2	45100	0.000474	10.51	106.7	3	48700	3390	0.000608	0.000108	12.4846	2.4	19.2237	10.0846	14.8846	Y	-1.97462
FAb11	3	44100	0.000489	11.0884	109.4	2	50400	2480	0.000611	5.34e-05	12.123	1.2	9.89853	10.923	13.323	Y	-1.03458
FAb02	4	49200	0.00062	12.6016	109.2	6	58400	4010	0.000823	5.91e-05	14.0925	1.4	9.93439	12.6925	15.4925	N	-1.49084
FAb07	5	45800	0.000626	13.6681	106.3	4	62600	6310	0.000804	2.3e-05	12.8435	1.4	10.9005	11.4435	14.2435	Y	0.824672
FAb19	6	28100	0.000505	17.9715	102.9	7	36600	1530	0.000586	3.84e-05	16.0109	1.2	7.49488	14.8109	17.2109	N	1.9606
FAb15	7	37400	0.000684	18.2888	103.1	5	57700	5950	0.0008	0.000118	13.8648	2.5	18.0312	11.3648	16.3648	N	4.42395
FAb18	8	34900	0.000688	19.7135	88.5	8	48500	3200	0.000844	3.1e-05	17.4021	1.3	7.47038	16.1021	18.7021	N	2.31141
FAb23	9	34800	0.000709	20.3736	80.6	9	40400	3360	0.000871	9e-05	21.5594	2.9	13.4512	18.6594	24.4594	Y	-1.18584
FAb16	10	41800	0.00121	28.9474	104.3	10	55900	4530	0.00149	6.33e-05	26.6547	2.5	9.37919	24.1547	29.1547	Y	2.29263
FAb08	11	39500	0.00122	30.8861	98.8	12	45200	2370	0.00137	3.61e-05	30.3097	1.8	5.93869	28.5097	32.1097	Y	0.576341
FAb04	12	43700	0.00139	31.8078	101.1	11	57200	4620	0.00166	0.000138	29.021	3.4	11.7157	25.621	32.421	Y	2.7868
FAb20	13	47900	0.00156	32.5678	86.7	14	45000	2340	0.00152	5.59e-05	33.7778	2.1	6.21711	31.6778	35.8778	Y	-1.20993
FAb09	14	75900	0.00253	33.3333	104.3	17	50200	2670	0.00263	4.8e-05	52.3904	3	5.72624	49.3904	55.3904	N	-19.0571
FAb12	15	42200	0.00145	34.3602	91.4	13	51300	3730	0.00172	8.13e-05	33.5283	2.9	8.64942	30.6283	36.4283	Y	0.831924
FAb24	16	34600	0.00161	46.5318	84.6	15	39400	3130	0.00159	8.61e-05	40.3553	3.9	9.66415	36.4553	44.2553	N	6.17646
FAb17	17	54300	0.00275	50.6446	98	18	50800	3260	0.00277	6.33e-05	54.5276	3.7	6.78556	50.8276	58.2276	N	-3.88299
FAb13	18	30900	0.0018	58.2524	74.2	20	24200	3020	0.00211	9.9e-05	87.1901	12	13.763	75.1901	99.1901	N	-28.9377
FAb05	19	29800	0.00176	59.0604	96.1	19	35900	1780	0.00196	4.95e-05	54.5961	3	5.4949	51.5961	57.5961	N	4.4643
FAb21	20	36700	0.00272	74.1144	68.6	16	33700	1800	0.00176	4.77e-05	52.2255	3.1	5.9358	49.1255	55.3255	N	21.8889
FAb14	21	10900	0.0127	1165.14	164.5	22	37300	4190	0.0143	0.000887	383.378	50	13.042	333.378	433.378	N	781.76
FAb06	22	8110	0.012	1479.65	188.3	21	42400	2120	0.0142	0.000416	334.906	19	5.67324	315.906	353.906	N	1144.75
FAb22	23	3180	0.0138	4339.62	489.5	23	27600	6440	0.0125	0.000249	452.899	112	24.7296	340.899	564.899	N	3886.72
